# Supplementary material for: The arginine methyltransferase PRMT7 promotes extravasation of monocytes resulting in tissue injury in COPD
Source: PubMed Central journal article supplement (PMC8921220; doi:10.1038/s41467-022-28809-4), 2022-03-14
Supplement: 41467_2022_28809_MOESM2_ESM.pdf [file 41467_2022_28809_MOESM2_ESM.pdf]

## Description of additional supplementary files

### **The Arginine Methyltransferase PRMT7 Promotes Extravasation of Monocytes resulting in tissue injury in COPD**

Gizem Günes Günsel<sup>1,†</sup>, Thomas M. Conlon<sup>1,†</sup>, Aicha Jeridi<sup>1,†</sup>, Rinho Kim<sup>2</sup>, Zeynep Ertüz<sup>1</sup>, Niklas J. Lang<sup>1</sup>, Meshal Ansari<sup>1,3</sup>, Mariia Novikova<sup>4,5,6</sup>, Dongsheng Jiang<sup>1</sup>, Maximilian Strunz<sup>1</sup>, Mariia Gaianova<sup>1</sup>, Christine Hollauer<sup>1</sup>, Christina Gabriel<sup>1</sup>, Ilias Angelidis<sup>1</sup>, Sebastian Doll<sup>3</sup>, Jeanine C. Pestoni<sup>1</sup>, Stephanie L. Edelman<sup>7</sup>, Marlene Sophia Kohlhepp<sup>8</sup>, Adrien Guillot<sup>8</sup>, Kevin Bassler<sup>9,10</sup>, Hannelore P. Van Eeckhoutte<sup>11</sup>, Özgecan Kayalar<sup>12</sup>, Nur Konyalilar<sup>12</sup>, Tamara Kanashova<sup>13</sup>, Sophie Rodius<sup>14</sup>, Carolina Ballester-López<sup>1</sup>, Carlos M. Genes Robles<sup>2</sup>, Natalia Smirnova<sup>1,15</sup>, Markus Rehberg<sup>1</sup>, Charu Agarwal<sup>1</sup>, Ioanna Krikki<sup>1</sup>, Benoit Piavaux<sup>16</sup>, Stijn E. Verleden<sup>17,18</sup>, Bart Vanaudenaerde<sup>17</sup>, Melanie Königshoff<sup>1,19</sup>, Gunnar Dittmar<sup>14,20</sup>, Ken R. Bracke<sup>11</sup>, Joachim L. Schultze<sup>9,21</sup>, Henrik Watz<sup>22</sup>, Oliver Eickelberg<sup>19</sup>, Tobias Stoeger<sup>1</sup>, Gerald Burgstaller<sup>1</sup>, Frank Tacke<sup>8</sup>, Vigo Heissmeyer<sup>7,23</sup>, Yuval Rinkevich<sup>1</sup>, Hasan Bayram<sup>12</sup>, Herbert B. Schiller<sup>1</sup>, Marcus Conrad<sup>4,5</sup>, Robert Schneider<sup>2</sup>, Ali Önder Yildirim<sup>1, 12\*</sup>

**Excel File of Supplementary Data File 1.** Enrichment of GO Molecular Function activities in the lungs of COPD patients following GSEA of GSE76925.

**Excel File of Supplementary Data File 2.** N-methyltransferase gene list (GO:0008170) from the GSEA enrichment plot of array data from lung tissue of COPD patients v healthy smokers (GSE76925).

**Excel File of Supplementary Data File 3.** LFQ intensities following anti-MMA IP proteome analysis.

**Excel File of Supplementary Data File 4.** Peptides identified following anti-MMA IP proteome analysis.

**Excel File of Supplementary Data File 5.** Enriched KEGG pathways following InCroMAP analysis of the differentially pulled down proteins with less abundance in *Prmt7*<sup>null</sup> compared to *Prmt7*<sup>+/+</sup> MHS cells.

**Excel File of Supplementary Data File 6.** Enrichment of cell death modalities in the lungs of COPD patients following GSEA of GSE47460.

**Excel File of Supplementary Data File 7.** Enrichment of cell death modalities in the lungs of mice exposed to chronic CS for 4m following GSEA of GSE125521.

**MP4 file of Supplementary Movie 1.** Live cell imaging of PI uptake by MLE12 cells treated with conditioned medium from pro-inflammatory macrophages over 24h.

**MP4 file of Supplementary Movie 2.** Live cell imaging of PI uptake by MLE12 cells treated with RSL3 over 24h.

**MP4 file of Supplementary Movie 3.** Live cell imaging of PI uptake by MLE12 cells treated with conditioned medium from anti-inflammatory macrophages over 24h.

**MP4 file of Supplementary Movie 4.** Live cell imaging of PI uptake by MLE12 cells treated with conditioned medium from control macrophages over 24h.
